# Supplementary figures and images for: BNIP3 supports melanoma cell migration and vasculogenic mimicry by orchestrating the actin cytoskeleton
Source: PubMed Central journal article supplement — Cell Death Dis. 2014 Mar 13;5(3):e1127–. doi: 10.1038/cddis.2014.94 (PMC3973222; doi:10.1038/cddis.2014.94), 2014-03-13

**A**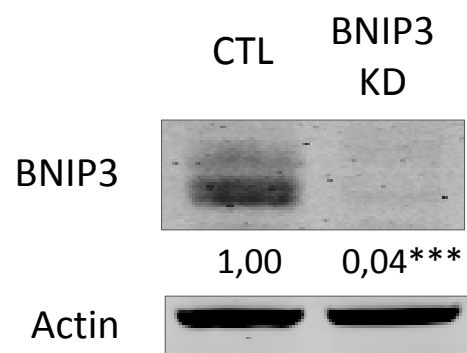**B**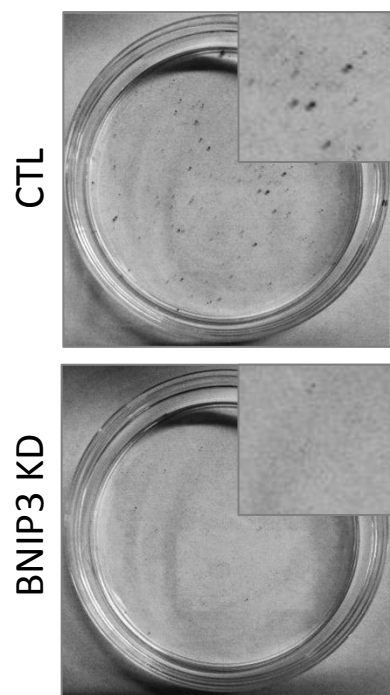**C**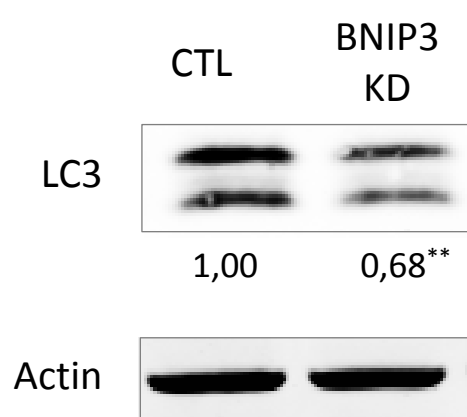**D**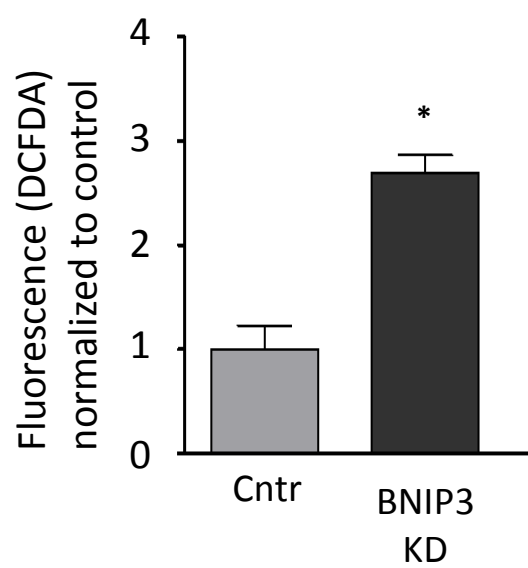

Supplement: cddis201494x1.pdf [file cddis201494x1.pdf]

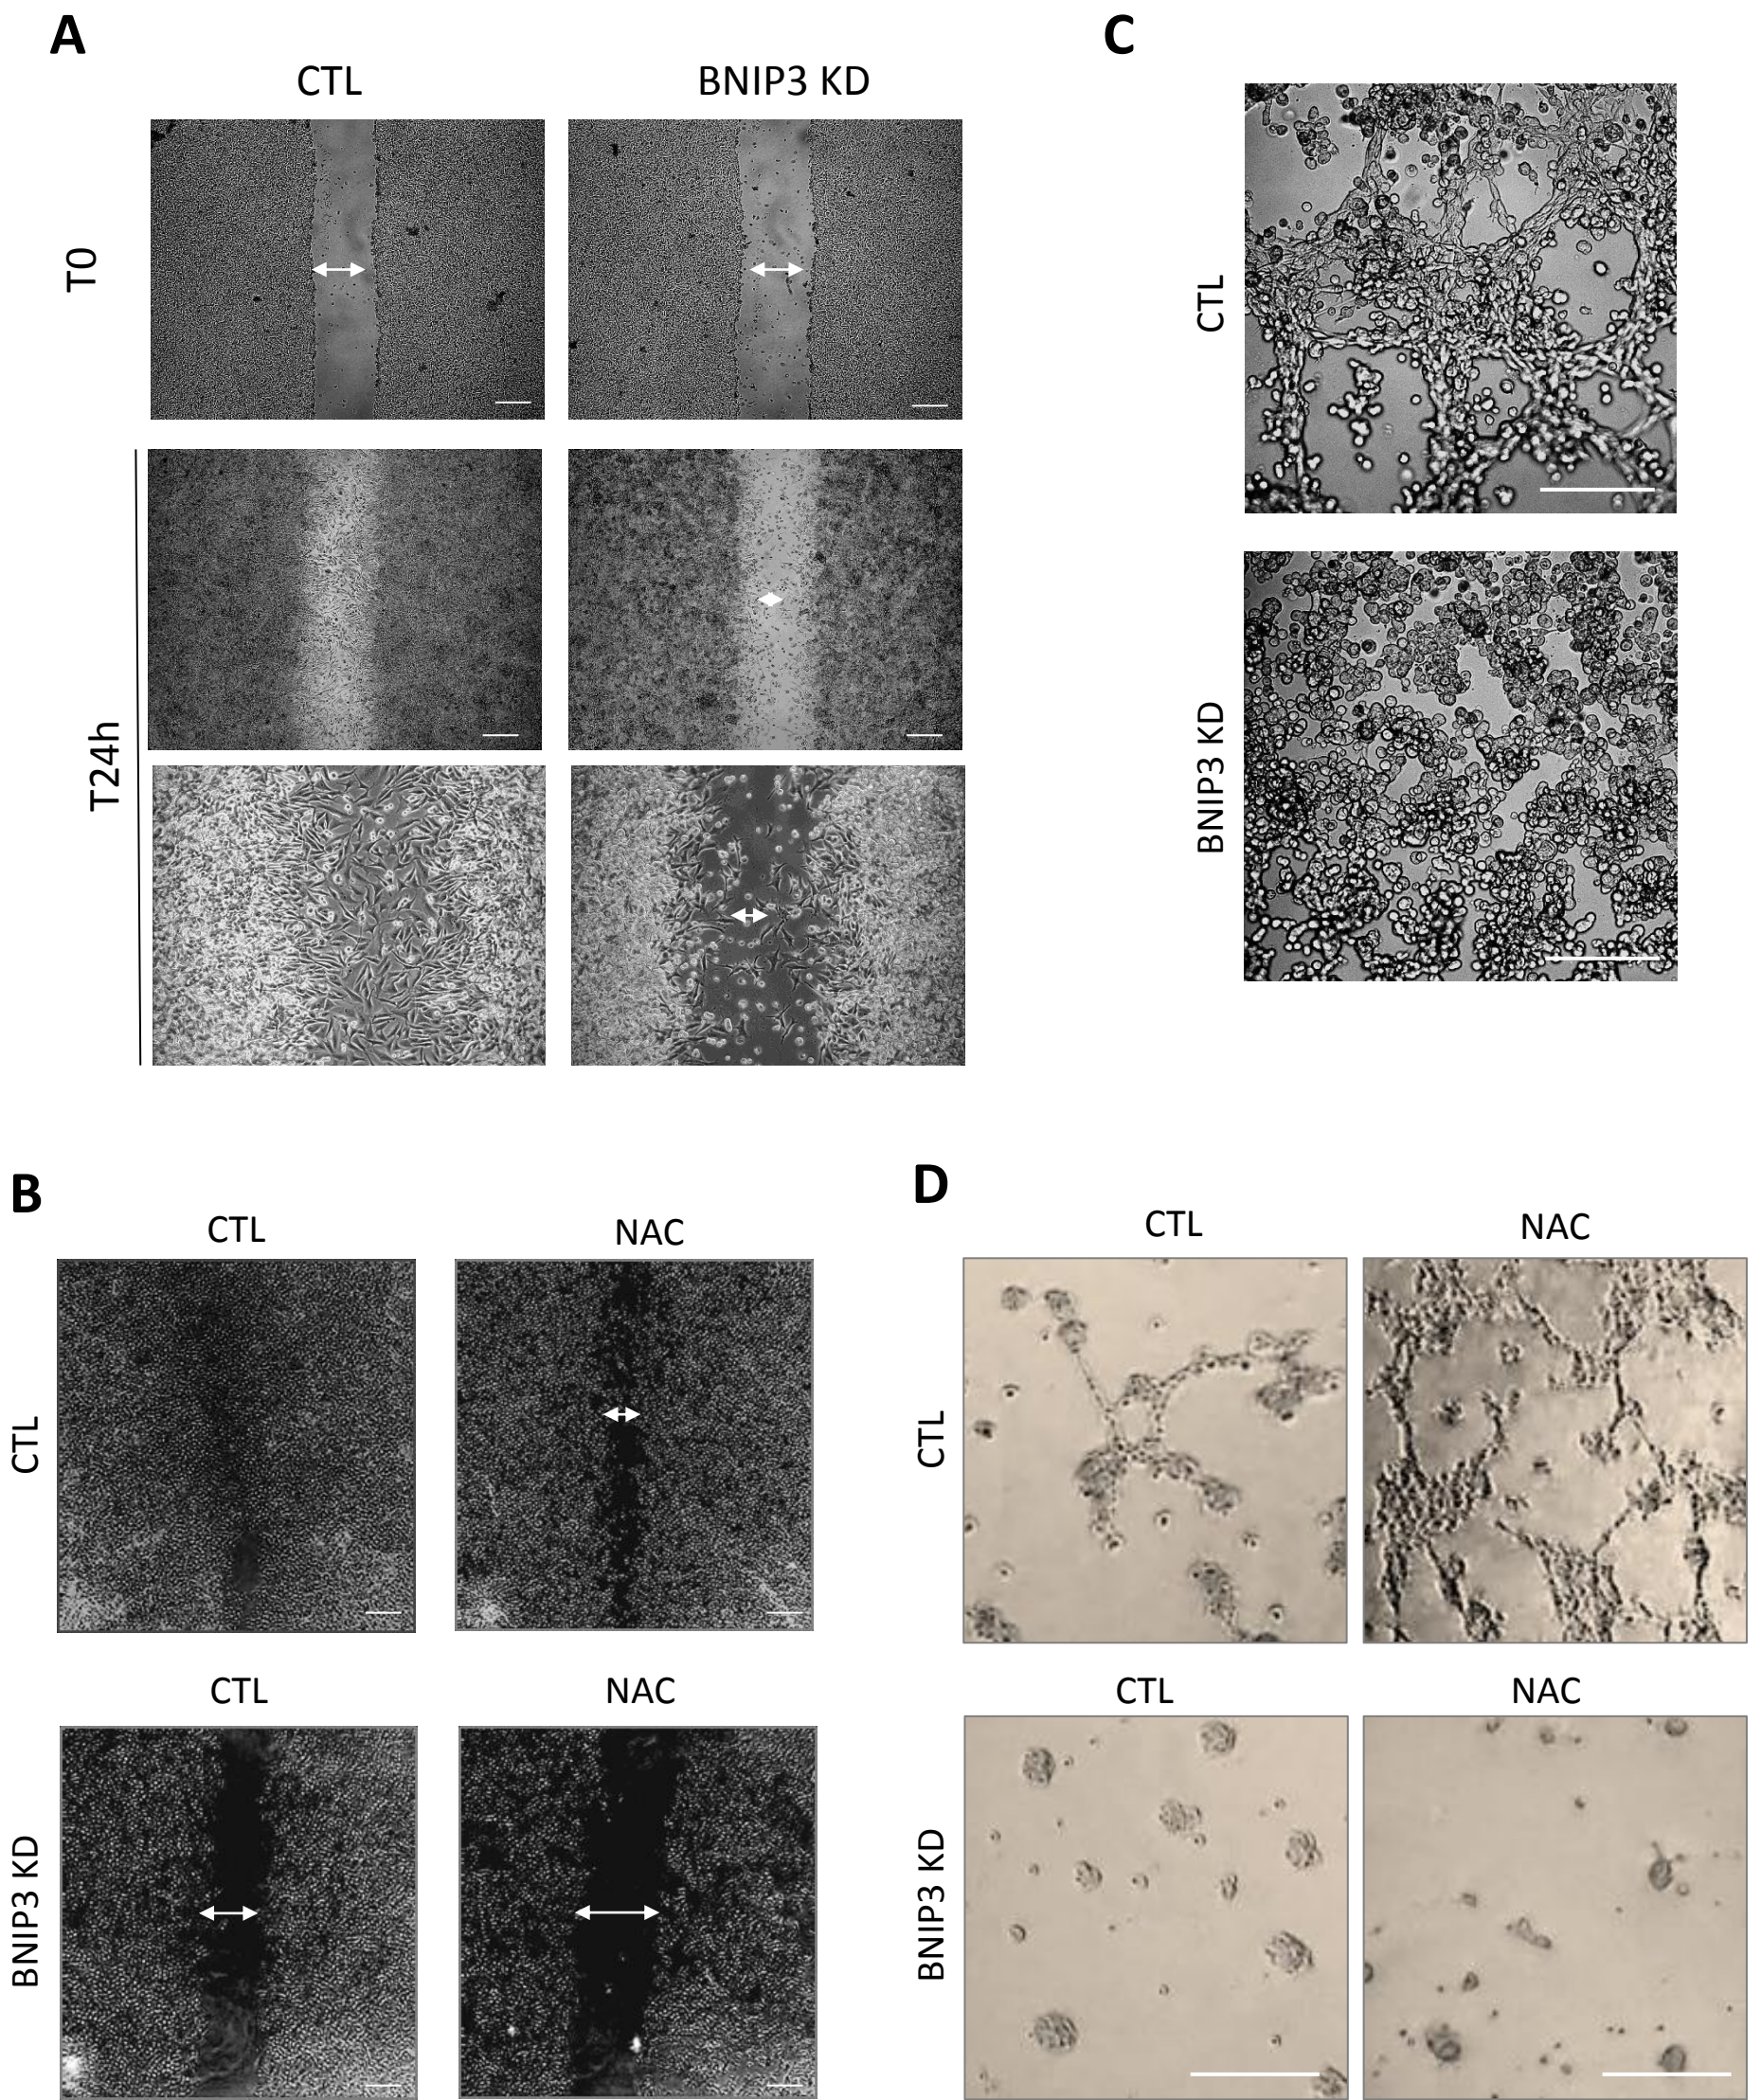

Figure S2

Supplement: cddis201494x2.pdf [file cddis201494x2.pdf]

**A**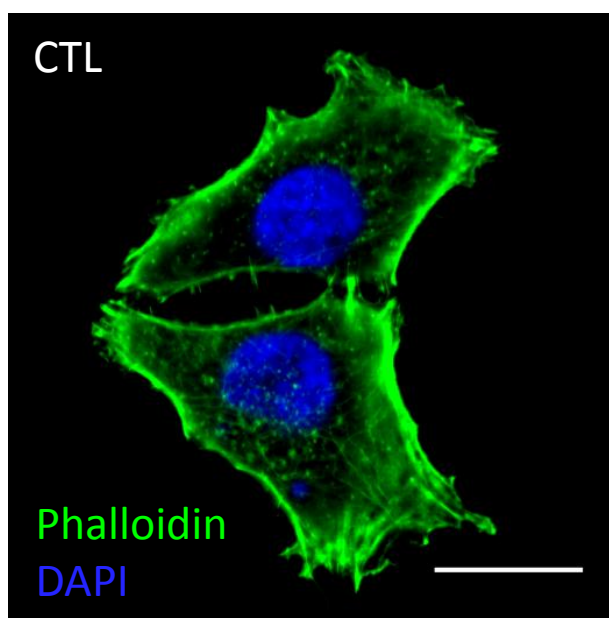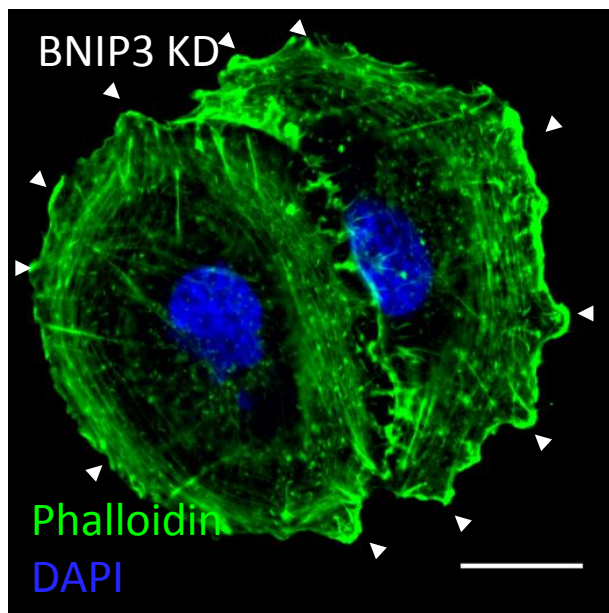**B**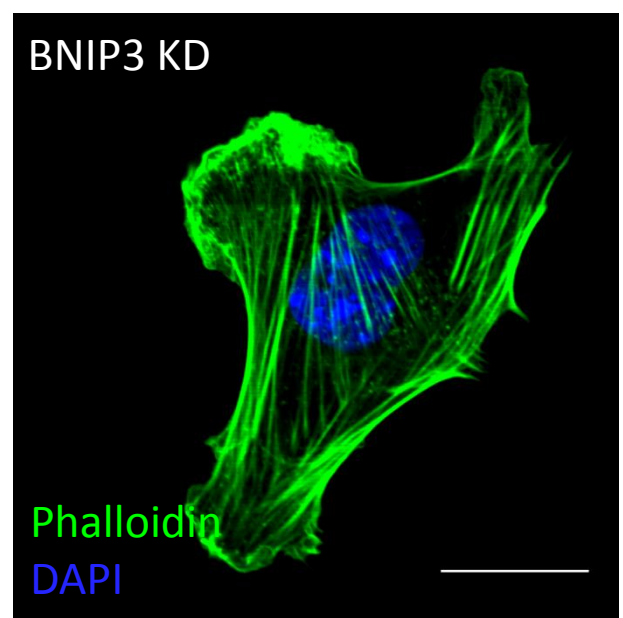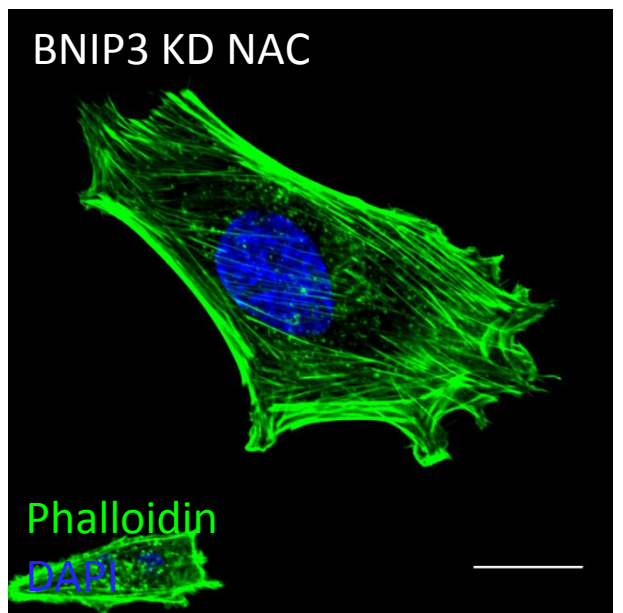**C**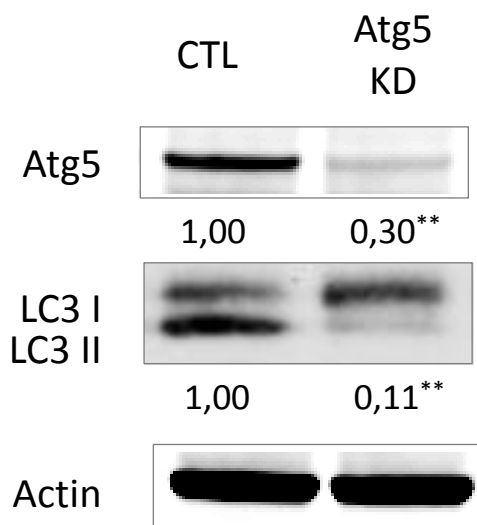**D**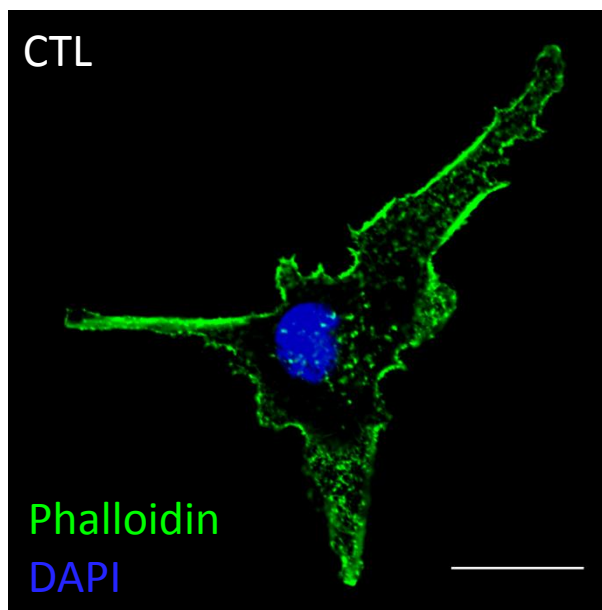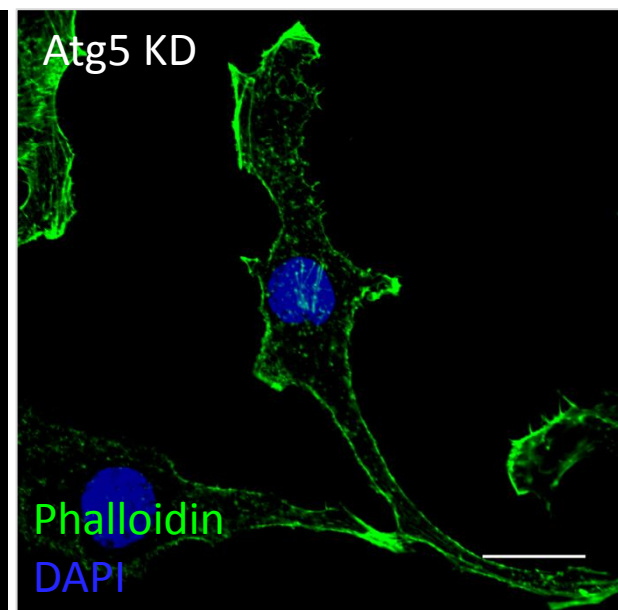

Supplement: cddis201494x3.pdf [file cddis201494x3.pdf]

**A**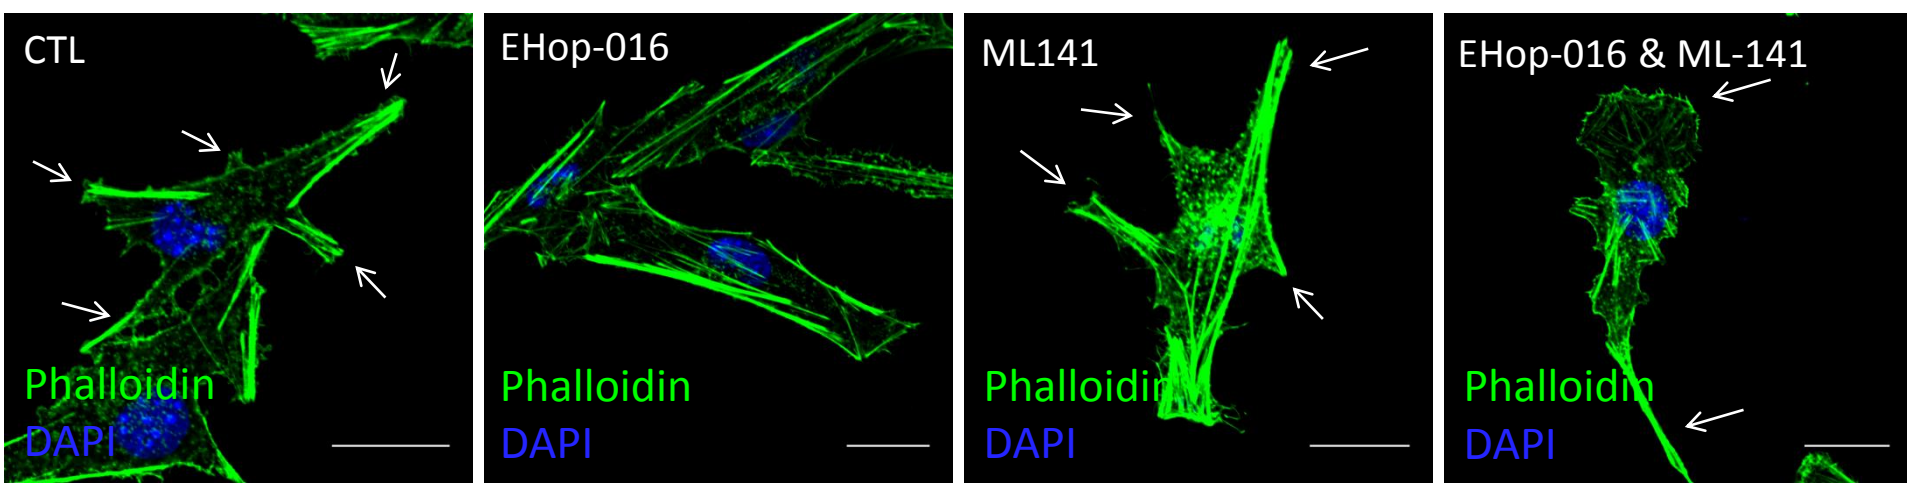**B**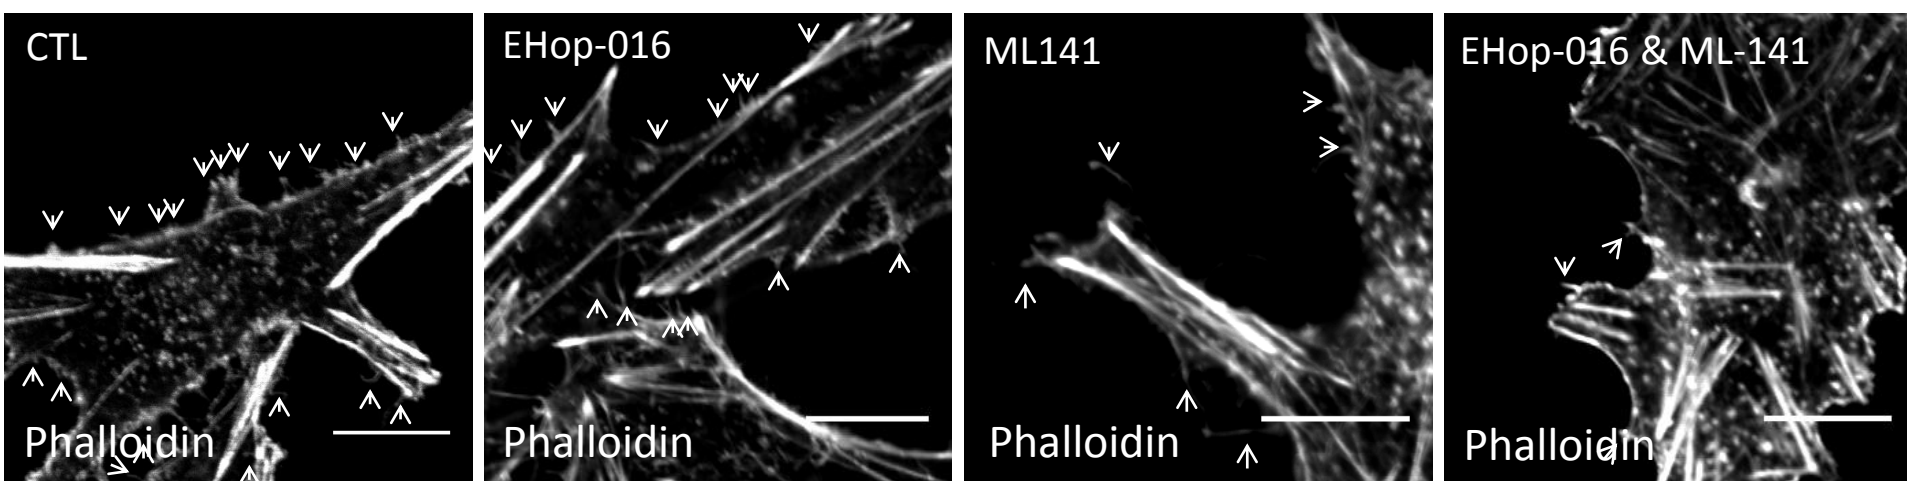

Figure S4

Supplement: cddis201494x4.pdf [file cddis201494x4.pdf]
